# Supplementary material for: Big data from the sky: popular perceptions of private drones in Switzerland
Source: Copernicus journal article supplement (doi:10.5194/gh-72-231-2017), 2017-06-06
Supplement: Supplementary file 1 [file gh-72-231-2017-supplement.pdf]

Supplement of Geogr. Helv., 72, 231–239, 2017  
<https://doi.org/10.5194/gh-72-231-2017-supplement>  
© Author(s) 2017. This work is distributed under  
the Creative Commons Attribution 3.0 License.

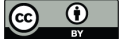

+ GEOGRAPHICA  
HELVETICA + supported by 

*Supplement of*

## **Big data from the sky: popular perceptions of private drones in Switzerland**

**Francisco Klauser and Silvana Pedrozo**

*Correspondence to:* Francisco Klauser ([francisco.klauser@unine.ch](mailto:francisco.klauser@unine.ch)) and Silvana Pedrozo ([silvana.pedrozo@unine.ch](mailto:silvana.pedrozo@unine.ch))

The copyright of individual parts of the supplement might differ from the CC BY 3.0 License.

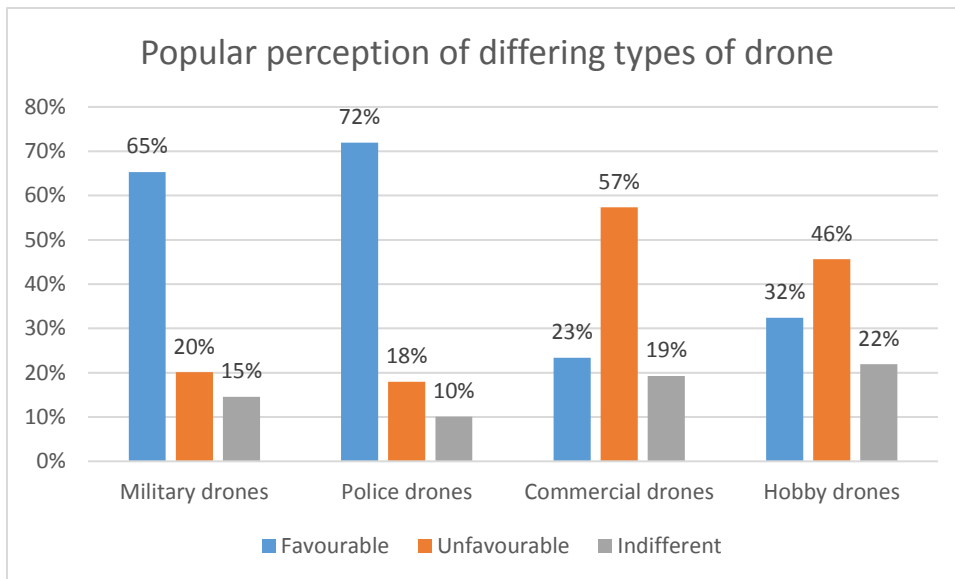

**Fig. 1:** Popular perception of differing types of drone

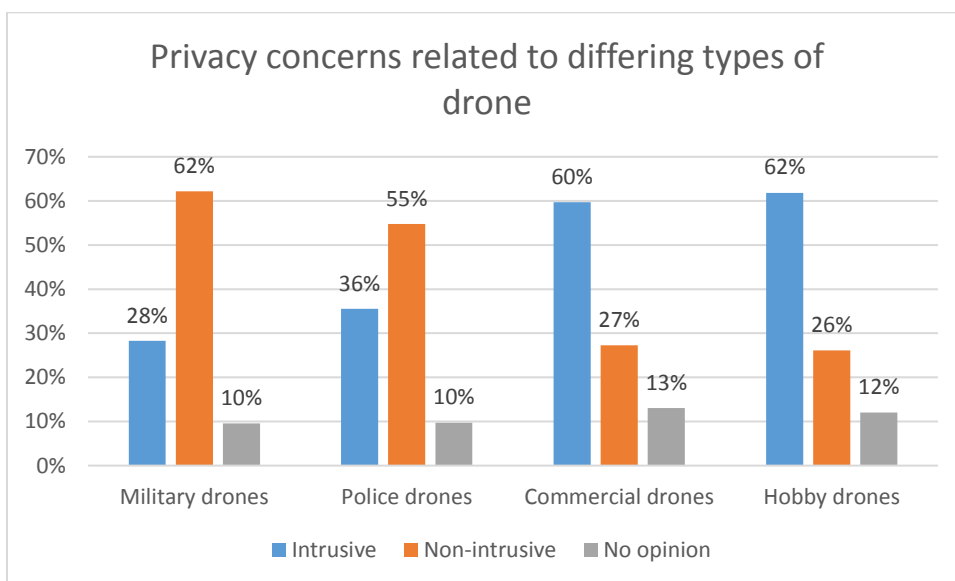

**Fig. 2:** Privacy concerns related to differing types of drone

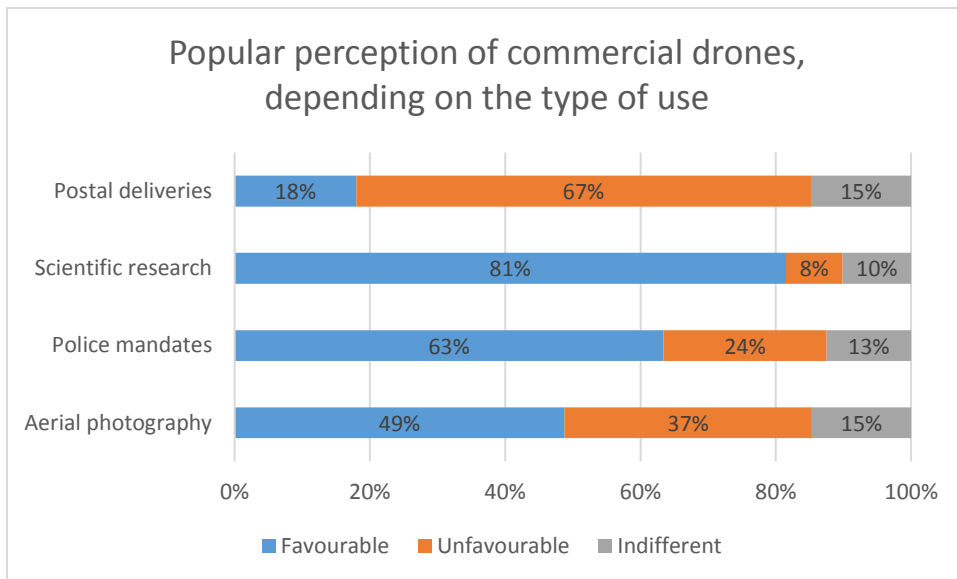

**Fig. 3:** Popular perception of commercial drones, depending on the type of use

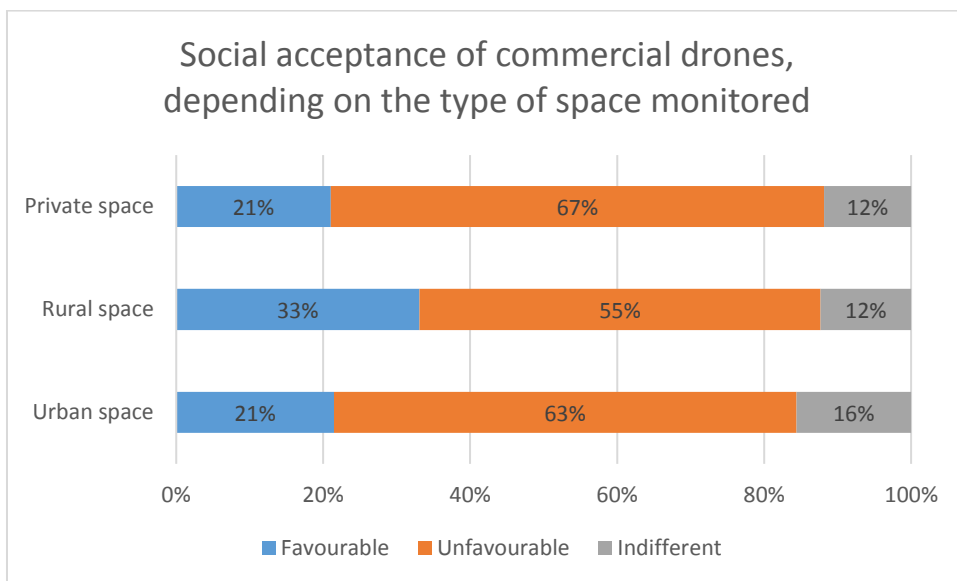

**Fig. 4:** Social acceptance of commercial drones, depending on the type of space monitored

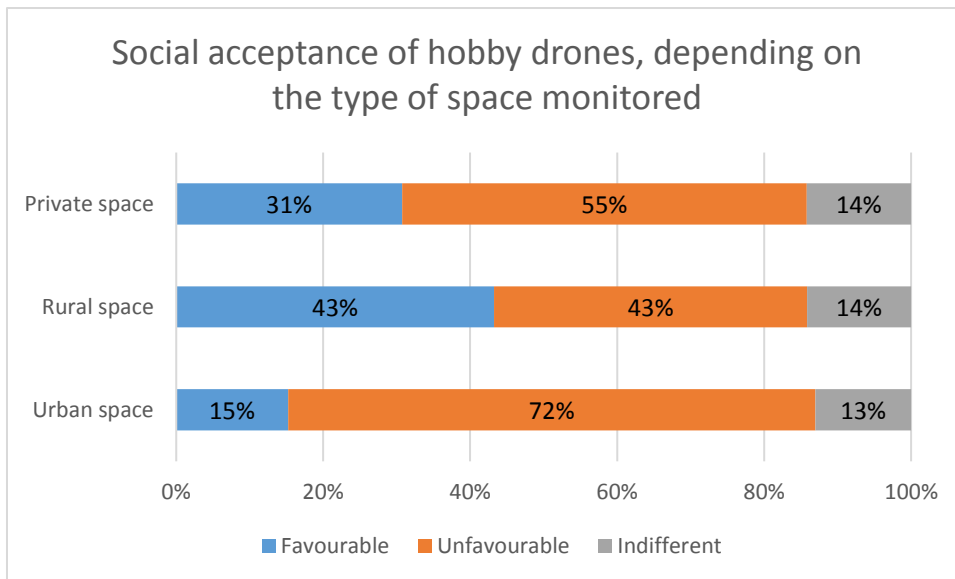

**Fig. 5:** Social acceptance of hobby drones, depending on the type of space monitored

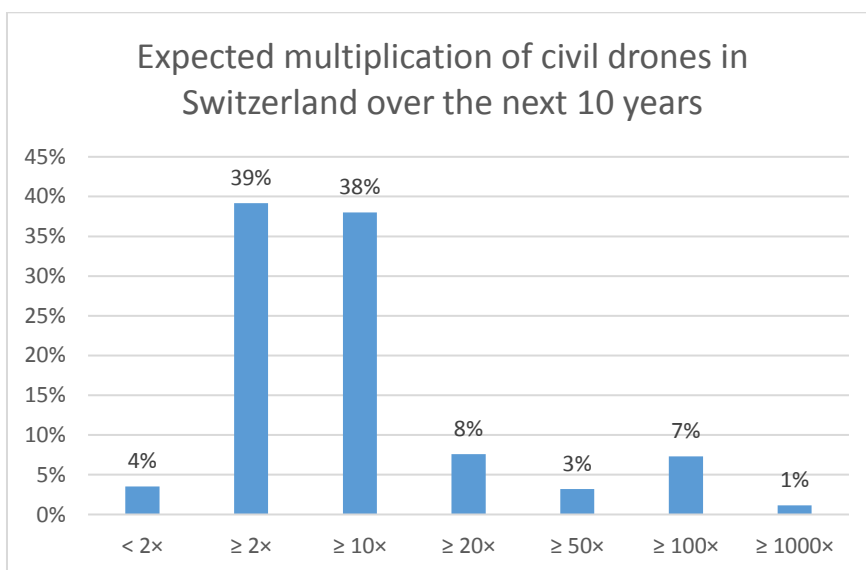

**Fig. 5:** Expected evolution of civil drones in Switzerland over the next 10 years

|  |       | <b>I am worried about accidents with commercial drones</b> |             |            |       |
|--|-------|------------------------------------------------------------|-------------|------------|-------|
|  |       | Agree                                                      | Don't agree | No opinion | Total |
|  | Agree | 253                                                        | 20          | 29         | 302   |

|                                                              |            |     |    |     |     |
|--------------------------------------------------------------|------------|-----|----|-----|-----|
| <b>I am worried about accidents with recreational drones</b> | Disagree   | 24  | 61 | 17  | 102 |
|                                                              | No opinion | 41  | 14 | 99  | 154 |
|                                                              | Total      | 318 | 95 | 145 | 558 |

**Table 1:** Fears of drone accidents connected to commercial and recreational usages
